# Supplementary material for: Calcareous nannofossil biostratigraphy, bioevents, and palaeoecological interpretation of the lower-middle Miocene outcrops in west central Sinai (Egypt)
Source: Frontiers journal article supplement (doi:10.3389/feart.2024.1442241), 2024-08-20
Supplement: Table_1.XLSX [file Table_1.XLSX]

## Sheet: Wadi Baba data
Sample No	71	72	73	74	75	76	77	78	79	80	81	82	83	84	85	86	87	88	89	90	91	94	95	96	97	99	100	101	102	103	104	105	106	107	108	109	110	111	112	113	114	116	117	120	121	122	123	125	126
Braarudosphera biglowei	0	0	0	0	1	0	0	2	0	0	0	0	0	1	0	0	1	0	0	0	0	0	0	1	0	0	1	1	2	0	0	0	0	0	0	0	6	2	5	0	1	2	0	0	0	0	1	0	0
Calcidiscus leptoporus	0	0	0	0	0	0	0	0	0	0	0	0	0	0	0	0	0	0	0	0	0	0	0	0	0	6	0	0	2	0	0	0	0	4	0	0	0	28	18	0	0	0	0	0	0	0	0	0	0
Calcidiscus premacintyrei	0	0	0	0	0	0	0	0	0	0	0	0	0	0	0	0	0	0	0	0	1	0	6	1	1	0	1	6	0	2	4	0	0	3	3	0	0	0	0	0	0	0	0	0	0	0	0	0	0
Coccolithus miopelagicus	0	0	0	0	1	0	0	0	0	0	0	0	0	0	0	0	0	0	0	0	0	0	0	0	0	1	0	2	0	0	0	0	0	0	0	0	0	3	0	0	0	0	0	0	0	0	0	0	0
Coccolithus pelagicus	48	64	196	60	30	230	80	50	40	60	120	5	12	105	18	123	135	115	120	90	138	195	120	275	44	88	148	300	150	225	40	68	205	180	80	70	45	190	200	55	55	61	70	2	0	10	47	0	150
Coronocyclus nitescens	0	0	0	0	0	0	1	0	0	0	0	0	0	0	0	0	0	0	0	0	1	0	0	0	0	0	0	0	0	0	0	0	0	0	0	0	0	0	0	0	0	1	0	0	0	0	0	0	0
Cyclicargolithus floridanus	6	0	0	0	0	0	25	5	0	0	0	0	5	0	0	0	0	10	15	14	37	3	24	5	0	0	0	0	8	33	16	0	0	12	0	0	30	6	30	5	0	2	10	0	0	5	15	0	9
Discoaster petaliformis	0	0	0	0	0	0	0	0	0	0	0	0	0	0	0	0	0	0	0	0	0	0	0	0	0	0	0	0	0	0	0	0	0	0	0	0	0	0	0	0	0	2	0	0	0	0	0	0	0
Discoaster cf. variabilis	0	0	0	0	0	0	0	0	0	0	0	0	0	0	0	0	0	0	0	0	0	0	0	0	0	0	0	0	0	0	0	0	0	0	0	0	0	0	0	0	0	1	0	0	0	0	0	0	0
Discoaster deflandrei	0	0	0	0	0	2	0	1	2	0	1	0	0	0	0	1	0	0	0	0	0	0	0	1	0	1	3	1	0	3	0	0	0	0	0	0	0	0	0	0	1	5	0	2	0	0	0	0	0
Discoaster druggii*	0	0	0	0	0	2	0	0	0	0	0	0	0	0	0	0	0	0	0	0	0	0	0	0	0	0	0	0	0	0	0	0	0	0	0	0	0	0	0	0	0	2	0	0	0	0	0	0	0
Discoaster exilis	0	0	0	0	0	0	0	0	0	0	0	0	0	0	0	0	0	0	0	0	0	0	0	0	0	0	0	0	0	0	0	0	0	0	0	0	0	0	0	0	0	3	0	0	1	0	0	0	0
Discoaster sp. 5 ray	0	0	0	0	0	0	0	0	0	0	0	0	0	0	0	0	0	0	0	0	0	0	0	0	0	3	1	0	0	0	0	0	0	0	0	0	0	0	0	1	0	0	0	0	0	0	0	0	0
Discoaster sp. 6 ray	0	0	5	4	0	0	0	0	0	0	2	0	0	1	0	0	0	0	0	0	0	0	0	0	0	0	0	0	0	0	0	0	0	0	0	0	0	2	1	1	0	5	2	0	0	1	0	0	0
Helicosphaera ampliaperta	3	0	6	4	0	20	0	1	0	0	1	0	0	0	0	0	0	0	0	0	0	6	0	0	0	0	0	0	0	0	0	0	2	0	0	0	0	0	3	3	0	0	2	0	0	1	0	0	1
Helicosphaera bownii	0	0	0	0	0	0	0	0	0	0	0	0	0	0	0	0	0	0	0	0	0	0	0	0	0	1	3	29	0	6	4	0	27	0	0	0	0	0	0	0	0	0	0	0	0	0	0	0	0
Helicosphaera carteri	0	0	0	0	0	1	0	0	0	0	0	0	0	0	0	0	0	0	0	0	0	0	0	0	0	0	0	0	0	2	0	0	0	0	0	0	0	2	0	2	1	3	0	0	0	0	0	0	0
Helicosphaera kamptneri	0	0	0	0	0	0	0	0	0	0	0	0	0	0	0	0	0	0	0	0	0	0	0	0	0	0	0	0	0	0	0	0	0	0	0	0	0	0	0	0	0	1	0	0	0	0	0	0	0
Helicosphaera mediterranea	0	0	0	0	2	0	1	0	0	0	0	0	0	4	0	4	5	1	0	0	0	3	0	4	0	0	0	0	0	0	0	0	0	0	0	0	0	0	0	0	0	0	0	0	0	0	0	0	0
Helicosphaera scissura	0	0	0	0	0	7	0	1	0	0	3	0	0	0	0	0	0	0	0	0	0	0	0	0	0	0	0	3	0	0	0	0	2	0	0	0	0	2	0	0	0	4	2	0	0	1	0	0	1
Helicosphaera walbersdorfensis	0	0	0	0	0	0	0	0	0	0	0	0	0	0	0	0	0	0	0	0	0	0	0	0	0	0	0	0	0	0	0	0	0	0	0	0	0	2	0	0	1	4	1	0	0	1	0	0	0
Helicosphera intermedia	0	0	0	0	0	1	0	0	0	0	0	0	0	0	0	0	0	0	0	1	0	0	0	0	0	0	1	0	0	2	0	0	0	0	0	0	0	5	6	0	0	8	0	0	0	0	0	0	0
Microantholithus vesper	0	0	0	0	0	0	0	0	0	0	0	0	0	0	0	0	0	0	0	0	0	0	0	0	0	0	0	0	0	0	0	0	0	0	0	0	0	2	0	0	1	0	0	0	0	0	0	0	0
Pontosphaera multipora	0	0	0	0	0	0	0	0	0	0	0	0	0	0	0	0	0	0	0	0	0	0	0	0	0	0	0	0	0	0	0	0	0	0	0	0	0	4	0	0	1	2	0	0	0	0	0	0	0
Reticulofenestra haqii	0	16	18	15	2	50	3	7	25	106	60	5	0	20	0	15	9	10	45	14	0	0	20	23	20	40	50	7	20	36	0	0	40	35	0	0	14	150	80	0	8	120	140	0	2	30	1	0	60
Reticulofenestra minuta	12	36	50	45	5	75	34	13	30	32	45	10	0	5	6	0	55	35	30	25	14	55	0	37	4	0	30	20	18	6	0	0	7	7	0	0	0	80	100	5	0	0	0	0	0	0	13	0	0
Reticulofenestra perplexa	0	4	0	0	0	0	10	0	10	0	0	0	0	0	0	0	0	0	0	0	7	0	0	0	9	6	0	0	0	33	4	4	4	21	10	0	100	0	6	7	0	4	22	1	0	7	0	0	0
Reticulofenestra producta	0	0	0	0	0	0	0	0	0	0	0	0	0	0	0	0	0	0	3	0	0	0	0	0	0	0	0	0	0	0	0	0	0	0	0	0	0	9	0	0	0	0	0	0	0	0	0	0	0
Reticulofenestrae pseudoumbilicus	6	0	1	1	0	0	15	0	0	0	15	0	6	0	0	0	0	0	0	0	18	16	12	2	0	0	0	0	6	24	0	0	8	25	8	18	25	27	50	15	10	17	12	0	0	0	3	0	15
Sphenolithus belemnos	0	1	1	1	0	2	0	0	0	0	0	0	0	0	0	0	0	0	0	1	1	0	1	0	0	0	0	0	0	0	0	0	0	0	0	0	0	0	0	0	0	0	0	0	0	0	0	0	0
Sphenolithus compactus	0	0	0	0	0	0	0	0	0	0	0	0	0	0	0	0	0	0	0	0	0	0	0	0	0	0	0	0	0	0	0	0	0	0	0	0	0	3	3	0	0	0	0	1	0	0	0	0	0
Sphenolithus conicus	0	2	0	1	0	2	0	1	0	0	0	1	0	0	0	0	0	0	0	0	0	0	0	0	0	0	0	0	0	0	0	0	0	0	0	0	0	0	0	0	0	0	0	0	0	0	0	0	0
Sphenolithus disbelemnos	0	0	0	0	0	2	0	0	0	0	0	0	0	0	0	0	0	0	0	0	0	0	0	0	0	0	0	0	0	0	0	0	0	0	0	0	0	0	0	0	0	0	0	0	0	0	0	0	0
Sphenolithus dissimilis	1	0	1	0	1	0	0	0	0	0	0	0	0	0	0	0	0	0	0	0	0	0	0	0	0	0	0	0	0	0	0	0	0	0	0	0	0	0	0	0	0	0	0	0	0	0	0	0	0
Sphenolithus heteromorphus	0	0	0	0	0	0	0	0	0	0	0	0	0	0	0	0	0	0	0	0	0	0	0	1	0	0	1	0	0	4	0	0	0	3	0	0	1	0	0	0	0	1	0	0	0	1	0	0	0
Sphenolithus morformis	0	0	2	1	1	1	4	0	0	0	0	0	0	0	0	0	2	1	0	0	0	0	0	1	0	0	0	0	0	6	0	0	0	8	6	0	0	0	10	0	0	1	5	0	0	0	0	0	0
Sphenolithus preasii	0	0	0	0	0	0	0	0	0	0	0	0	0	0	0	0	0	1	1	3	0	0	0	1	0	0	0	0	0	0	0	0	0	0	0	0	0	0	0	0	0	0	0	0	0	0	0	0	0
[truncated: 27 more columns]

## Sheet: Wadi Gharandel data
Sample No	G1	G2	G3	G4	G5	G6	G7	G8	G9	G11	G12	G13	G14	G15	G16	G17	G18	G19	G20	G21	G22	G23	G24	G25	G26	G27	G28	G29	G30	G31	G32	G33	G34	G35	G36	G37	G38	G39	G40	G41	G42	G43	G44	G45	G46	G47	G48	G49	G50
Braarudosphera biglowei	0	0	0	0	3	0	0	0	0	3	3	0	0	0	0	0	0	0	0	0	0	0	0	0	2	0	0	0	1	0	0	0	0	0	0	3	3	0	1	0	0	0	1	2	0	0	0	1	2
Calcidiscus leptoporus	0	0	0	0	0	0	0	0	0	0	0	0	0	0	0	0	0	0	0	0	0	0	0	0	0	0	0	0	0	0	0	0	0	0	0	0	0	0	0	3	0	0	0	0	0	0	0	0	0
Calcidiscus premavynteri	0	0	0	0	0	0	0	4	1	0	0	0	0	0	0	3	6	4	0	0	0	0	0	0	0	0	0	0	0	0	0	0	0	0	0	0	1	0	0	3	0	0	0	0	0	0	0	0	0
Coccolithus miopelagicus	0	0	0	0	0	0	0	0	0	9	0	0	0	0	0	0	0	0	0	4	10	0	0	0	0	0	0	0	0	0	0	0	0	0	6	6	0	6	3	0	0	0	0	0	0	0	0	3	0
Coccolithus pelagicus	300	190	161	300	195	65	95	28	10	305	310	200	30	82	10	275	250	90	40	30	46	320	150	120	320	140	231	200	291	190	312	150	72	20	315	350	270	320	330	45	110	39	175	219	45	0	35	123	350
Coronocyclus nitescens	2	0	0	0	0	0	0	0	0	0	0	0	0	0	0	0	0	0	0	0	0	0	0	0	0	0	0	0	2	0	0	0	0	0	0	0	0	0	0	0	0	0	0	0	0	0	0	0	0
Cyclicargolithus floridanus	10	20	2	60	17	14	29	36	8	20	18	9	10	26	4	20	48	50	10	7	0	14	0	0	10	4	33	1	0	15	9	8	8	0	0	0	10	20	10	9	1	0	0	3	0	0	0	0	7
Discoaster deflandrei	1	0	0	0	2	1	0	0	0	3	0	0	0	0	0	0	0	0	0	0	0	0	2	1	0	0	0	2	0	0	0	0	2	0	0	0	4	0	2	0	0	0	1	0	0	0	0	0	0
Discoaster druggii*	0	0	0	0	0	0	0	1	0	1	0	0	0	0	0	0	0	0	0	0	0	0	0	0	0	0	0	0	0	0	0	0	0	0	0	0	0	0	0	0	0	0	0	0	0	0	0	0	0
Discoaster exilis	0	0	0	0	0	0	0	0	0	0	0	0	0	0	0	0	0	0	0	0	0	0	0	0	0	0	0	0	0	0	0	0	0	0	0	0	0	0	1	0	0	0	0	0	0	0	0	0	0
Discoaster sp. 5 ray	0	0	0	0	0	0	0	0	0	0	0	0	0	0	0	0	0	0	0	0	0	0	0	0	0	0	0	0	0	0	0	0	0	0	0	0	0	0	0	0	0	0	0	0	0	0	0	0	7
Discoaster sp. 6 ray	0	0	0	0	0	0	0	0	0	4	0	6	0	0	0	0	0	0	0	0	0	0	8	3	0	0	0	5	4	0	0	4	0	0	0	0	0	0	1	0	0	0	2	3	0	0	0	0	2
Discoater cf. variabilis	0	0	0	0	0	0	0	0	0	0	0	0	0	0	0	0	0	0	0	0	0	0	0	0	0	0	0	0	0	0	0	0	0	0	0	0	0	0	0	0	0	0	0	0	0	0	0	0	0
Helicosphaera ampliaperta	0	0	0	0	2	0	0	1	2	3	3	5	0	0	0	0	3	0	0	0	0	0	0	0	0	0	0	0	2	0	0	0	0	0	0	0	0	0	0	0	0	0	0	1	0	0	0	0	0
Helicosphaera bownii	0	0	0	0	0	0	0	0	0	0	0	0	0	0	0	0	0	0	0	0	0	0	0	0	0	0	0	0	0	0	0	0	0	0	0	0	0	0	0	0	0	0	0	0	0	0	0	0	0
Helicosphaera carteri	1	0	0	0	0	0	1	0	0	2	0	0	0	0	0	0	4	2	0	0	0	4	0	0	0	0	0	0	0	0	0	0	0	0	0	0	0	0	0	0	0	0	0	0	0	0	0	0	0
Helicosphaera euphratis	0	1	0	0	0	0	1	0	0	0	1	0	0	0	0	0	0	0	0	0	0	0	0	0	0	0	0	1	0	0	0	0	0	0	0	0	0	0	0	0	0	0	0	0	0	0	0	0	0
Helicosphaera kamptneri	0	0	0	0	2	0	0	0	0	0	0	0	0	0	0	0	0	0	0	0	0	0	0	0	0	0	0	0	0	0	0	0	0	0	0	0	0	0	0	0	0	0	0	0	0	0	0	0	3
Helicosphaera mediterranea	8	0	0	0	7	0	0	0	0	0	1	3	0	0	0	0	7	0	0	0	0	0	0	0	0	0	0	0	0	0	0	0	0	0	0	0	0	0	0	0	0	0	0	0	0	0	0	0	6
Helicosphaera rhomba	0	0	0	0	0	0	0	0	0	0	0	0	0	0	0	0	0	0	0	0	0	0	0	0	0	0	0	0	0	0	0	0	0	0	0	0	0	0	0	0	0	0	0	1	0	0	0	0	0
Helicosphaera scissura	1	0	0	0	0	0	2	0	1	1	5	3	1	4	0	4	12	6	0	0	2	0	0	0	0	2	0	3	0	0	0	0	0	0	0	0	0	0	0	0	0	0	0	0	0	0	0	0	0
Helicosphaera walbersdorfensis	0	0	0	0	0	0	2	1	0	0	0	0	0	1	0	0	0	0	0	0	0	0	0	0	0	0	0	0	0	0	0	0	0	0	0	0	0	0	0	0	0	0	0	0	0	0	0	0	0
Helicosphera intermedia	3	8	1	0	0	0	2	0	0	3	6	3	0	3	0	12	0	0	0	0	0	0	0	0	7	4	0	5	0	0	1	0	0	0	3	9	12	3	5	0	0	0	1	0	3	0	0	0	0
Microantholithus vesper	0	0	0	0	0	0	0	0	0	0	0	0	0	0	0	0	0	0	0	0	0	0	0	0	0	0	0	0	0	0	0	0	0	0	0	0	0	0	1	2	0	0	0	0	0	0	0	0	0
Pontosphaera multipora	0	0	0	0	2	0	3	0	0	3	4	0	0	0	0	0	3	0	0	0	1	15	0	0	0	0	0	3	0	3	0	0	0	0	0	0	0	6	0	0	1	0	1	0	0	0	0	1	2
Reticulofenestra haqii	100	75	70	100	60	62	68	55	18	170	175	75	14	50	5	180	200	120	30	22	41	75	97	85	95	31	60	75	15	75	59	30	55	10	135	300	120	110	210	39	30	5	100	53	30	0	7	55	225
Reticulofenestra minuta	70	65	19	50	25	11	55	50	10	190	200	65	4	40	2	100	30	50	0	4	0	50	27	20	53	14	45	100	0	60	29	19	25	3	45	95	30	100	110	24	17	3	9	7	10	0	5	15	150
Reticulofenestra perplexa	0	0	0	0	0	0	0	20	0	0	0	0	0	3	0	6	4	7	0	0	0	15	0	0	0	6	0	0	0	0	0	0	0	0	0	0	17	6	0	3	2	1	5	3	0	0	0	0	15
Reticulofenestrae pseudoumbilicus	8	2	6	0	7	29	57	25	3	50	55	9	0	6	0	15	0	15	0	0	14	15	0	0	3	4	0	6	9	0	13	9	12	6	0	0	15	6	0	3	0	0	0	0	0	0	0	2	6
Sphenolithus belemnos	0	0	0	0	1	0	0	0	0	0	0	0	0	0	0	0	0	0	0	0	0	0	0	0	0	0	0	0	0	0	0	0	0	0	0	0	0	0	0	0	0	0	0	0	0	0	0	0	0
Sphenolithus compactus	0	0	0	0	1	0	2	0	0	3	3	0	0	0	0	4	2	0	0	0	0	0	0	0	0	0	0	0	0	0	0	0	0	0	0	0	1	0	0	0	0	0	0	0	0	0	0	0	0
Sphenolithus heteromorphus	0	0	0	0	0	0	0	4	0	2	2	0	0	0	0	6	3	0	0	2	0	9	0	0	6	0	0	0	2	2	5	0	0	1	0	0	10	0	0	0	0	0	1	0	0	0	0	1	5
Sphenolithus morformis	0	0	0	0	0	0	1	0	0	0	0	0	0	0	0	0	0	0	0	0	0	0	0	0	0	0	0	0	0	0	0	0	0	0	0	0	0	0	0	0	0	0	0	0	0	0	0	0	0
Thoracosphera operculata	3	0	0	0	0	0	0	0	0	0	18	21	0	0	0	25	0	0	0	0	0	0	9	8	0	0	0	7	0	0	6	3	0	0	9	6	0	6	5	3	1	0	2	3	0	0	0	2	9
[truncated: 49 more columns]
